# Towards reproducible models of sequence learning: replication and analysis of a modular spiking network with reward-based learning

Barna Zajzon<sup>1,2\*</sup>, Renato Duarte<sup>3</sup>, Abigail Morrison<sup>1,2</sup>

**1** Institute of Neuroscience and Medicine (INM-6) and Institute for Advanced Simulation (IAS-6) and JARA-BRAIN Institute I, Jülich Research Centre, 52425 Jülich, Germany

**2** Department of Computer Science 3 - Software Engineering, RWTH Aachen University, Aachen, Germany

**3** Donders Institute for Brain, Cognition and Behavior, Radboud University, Nijmegen, the Netherlands

\* [b.zajzon@fz-juelich.de](mailto:b.zajzon@fz-juelich.de)

## Abstract

To acquire statistical regularities from the world, the brain must reliably process, and learn from, spatio-temporally structured information. Although an increasing number of computational models have attempted to explain how such sequence learning may be implemented in the neural hardware, many remain limited in functionality or lack biophysical plausibility. If we are to harvest the knowledge within these models and arrive at a deeper mechanistic understanding of sequential processing in cortical circuits, it is critical that the models and their findings are accessible, reproducible, and quantitatively comparable. Here we illustrate the importance of these aspects by providing a thorough investigation of a recent model proposed by Cone and Shouval (2021). We re-implement the modular columnar architecture and reward-based learning rule in the open-source NEST simulator, and successfully replicate the main findings of the original study. Building on these, we perform an in-depth analysis of the model's robustness to parameter settings and underlying assumptions, highlighting its strengths and weaknesses. We demonstrate a limitation of the model consisting in the hard-wiring of the sequence order in the connectivity patterns, and suggest possible solutions. Finally, we show that the core functionality of the model is retained under more biologically-plausible constraints.

## Keywords:

reproducibility, sequence learning, modularity, reward-based learning, spiking networks

# 1 Introduction

Navigating in a dynamic environment requires actions and decisions that are precisely coordinated in time and space, matching the spatio-temporally structured stimuli upon which they are based. Therefore, the ability to learn, process and predict sequential patterns is a critical component of cognition, with recent experimental findings showing a multitude of brain regions to be involved in sequence processing (Dehaene et al., 2015; Wilson et al., 2018; Henin et al., 2021). Some areas, such as the hippocampus, specialize on (spatial) tasks that rely mainly on the ordinal information within the sequence and *compress* the temporal features, for instance by recalling sequences faster than experienced (August and Levy, 1999). Other regions, including early sensory areas such as the primary visual cortex, are capable of learning and recalling not just the order of a series of stimulus patterns, but also the duration of the individual elements (Xu et al., 2012; Gavornik and Bear, 2014). In fact, the ability to represent both the ordinal and temporal components of a sequence are two of the most fundamental requirements for any system processing sequential information.

However, most existing models of unsupervised biological sequence learning address only the first of these two criteria, focusing on acquiring the order of elements and typically failing to account for their duration. They either cannot intrinsically represent the time intervals (Klos et al., 2018; Bouhadjar et al., 2021), or they assume a fixed and identical duration for each element that is limited by the architecture (Maes et al., 2021), or they produce longer sequences that arise spontaneously even in the absence of structured input (and hence are not related to it, Fiete et al., 2010). Other studies have shown that event and stimulus duration can be encoded via transient trajectories in the neural space through the sequential activation of different cell assemblies, but these mechanisms were either restricted in time (Duarte and Morrison, 2014; Duarte et al., 2018), explored in the context of working memory (Mongillo et al., 2008; Fitz et al., 2020) or relied on heavily engineered network architectures (Klampfl and Maass, 2013).

Seeking to unify these computational features, Cone and Shouval (2021) recently proposed a novel, biophysically realistic spiking network model that avoids the problem of temporal compression while maintaining the precise order of elements during sequence replay. Relying on a laminar structure, as well as experimentally observed cell properties, the system uses a local, eligibility-based plasticity rule (3-factor learning rule see, e.g. Frémaux et al., 2015; Porr and Wörgötter, 2007; Magee and Grienberger, 2020; Gerstner et al., 2018) to learn the order of elements by mapping out a physical path between stimulus-tuned columns (akin to (Zajzon et al., 2019)), with the duration of each item being encoded in the recurrent activations within the corresponding column. The learning rule, based on the competition between two eligibility traces and a globally available reward signal, is grounded in recent experimental findings (He et al., 2015; Huertas et al., 2016). This modular architecture allows the network to flexibly learn and recall sequences of up to eight elements with variable length, but only with simple transitions between items (first-order Markovian). More intricate sequences with history dependence (i.e., higher-order Markovian) can be learned, but require additional structures for memory. Given the increased complexity, this ability is only demonstrated in a continuous rate-based model.

The code for the model is available in *MATLAB*. As this is a proprietary, closed-source software, models expressed in this manner have accessibility issues (not every scientist can afford a license) and bear a greater risk of becoming non-executable legacy code, if the code is not regularly maintained (for an example, see Schulte to Brinke et al., 2022). Additionally, as *MATLAB* is a general purpose numeric computing platform, the researcher must develop all neuroscientific models and simulation algorithms *de novo*, which presents a higher risk for implementation errors and poorly-suited numerics (Pauli et al., 2018).

In this article we therefore present a replication of the original study, which serves the twin purpose of testing the original findings and providing a more accessible version of the model to the computational neuroscience community. Specifically, we re-implement their model using the open source software *NEST* (Gewaltig and Diesmann, 2007) to simulate the networks and Python for data analysis, thus ensuring a reusable and maintainable code base.

Here, we use the term *replication* in the  $R^5$  sense described by Benureau and Rougier (2018), i.e. striving to obtain the same results using an independent code base, whereas a *reproduction* ( $R^3$ ) of the model would have been achieved if we had obtained the results of the original study using the original code. However, others have argued these terms should be used the other way around: see Plesser (2018) for an overview and analysis.

Our re-implementation successfully replicates the principal results on the spiking network model from the original publication. Going beyond the reported findings, we perform an extensive sensitivity analysis of the network and learning parameters, and identify the critical components and assumptions of the model. We test the model at multiple scales and infer basic relations between the scale and numerical values of different parameters.

55 Additionally, we show that the original model and implementation rely on pre-wired feedforward projections  
56 between the columns to successfully learn the order of elements within a given sequence. We discuss why learning  
57 fails when generalizing to a more plausible architecture in which projections between all columns are allowed,  
58 and provide two possible solutions which restore the system’s functionality. Finally, we demonstrate that the  
59 core learning mechanisms can be retained in a functionally equivalent network architecture that contains only  
60 local inhibitory circuits, in line with cortical connectivity patterns (Brown and Hestrin, 2009).

61 The challenges we faced in replicating this study highlight the importance of detailed and accurate documentation,  
62 as well as access to the model code. In fact, a successful replication of the main results would not have been  
63 possible without being able to refer to the original implementation. In addition to multiple discrepancies between  
64 the model description and the code, some of the conceptual limitations we reveal here arise from certain critical  
65 implementation details (as discussed in Pauli et al., 2018).

66 Our findings thus demonstrate that undertakings such as these to replicate a study can also serve to improve  
67 the overall quality and rigour of scientific work. Moreover, if carried out shortly after the original publication,  
68 such in-depth analysis can lead to a better understanding of the computational model and thus both increase  
69 the likelihood that further models will be based on it, and decrease the likelihood that those models contain  
70 incorrect implementations or implicit (but critical) assumptions.

## 71 2 Results

72 To investigate how temporal sequences of variable durations can be acquired by cortical circuits, Cone and  
73 Shouval (2021) propose a chain-like modular architecture where each population (module) is tuned to a specific  
74 element in the sequence, and learning translates to modifications of the synaptic weights within and between  
75 modules, based on reward signals. We re-implement the model, originally in *MATLAB*, using the open-source  
76 software *NEST*. For access to the original code and our re-implemented version, please see the Data Availability  
77 Statement below.

78 The model is schematically illustrated in Figure 1A). Following a training period where the modules are stimulated  
79 in a particular order over multiple trials, the network should be able to recall/replay the complete sequence from  
80 a single cue. If learning was successful, both the order and duration of the elements can be recalled faithfully.

81 Initially, each module exhibits only a transient activity in response to a brief stimulus (50 ms, see Methods), as  
82 the connections are relatively weak. The duration of each sequence element is marked by a globally available  
83 reward signal, forming the central component of a local reinforcement learning rule based on two competing,  
84 Hebbian-modulated eligibility traces (Huertas et al., 2016). This synapse-specific rule is used to update the  
85 weights of both recurrent and feedforward connections, responsible for the duration of and transition between  
86 elements, respectively. After learning, these weights are differentially strengthened, such that during a cued  
87 recall the recurrent activity encodes the current element’s extent, while the feedforward projections stimulate  
88 the module associated with the next sequence element.

89 The modules correspond to a simplified columnar structure roughly mapping to L2/3 and L5 in the cortex.  
90 The columns are composed of two excitatory populations, *Timer* ( $T$ ) and *Messenger* ( $M$ ), and two associated  
91 inhibitory populations  $I_T$  and  $I_M$  (Figure 1B), each containing 100 LIF neurons and conductance-based, saturating  
92 synapses (see Methods). Timer cells learn to represent the duration through plastic recurrent connections, while  
93 Messenger cells learn the transitions to the column associated with the next sequence element. Note that, unless  
94 otherwise mentioned, feedforward projections exist only between columns corresponding to consecutive items in  
95 the input sequence. In other words, the sequence transitions are physically traced out from the onset, only the  
96 weights are learned (see also Discussion). Cross-inhibition between the columns gives rise to a soft winner-take-all  
97 (WTA) behavior, ensuring that only one column dominates the activity.

### 98 2.1 Sequence learning and recall

99 This modular architecture allows the system to robustly learn and recall input sequences with variable temporal  
100 spans. Figure 1C depicts the population responses before and after the network has learned four time intervals,  
101 500, 1000, 700 and 1800 ms (see also Figure 3 in Cone and Shouval, 2021). At first, stimulation of one column  
102 produces a brief response, with initial transients in the stimulated Timer and  $L_5$  inhibitory cells  $I_T$  (see Figure 1C,  
103 top panel and inset). With the inhibitory firing rate decaying faster than the Timers’ due to higher threshold

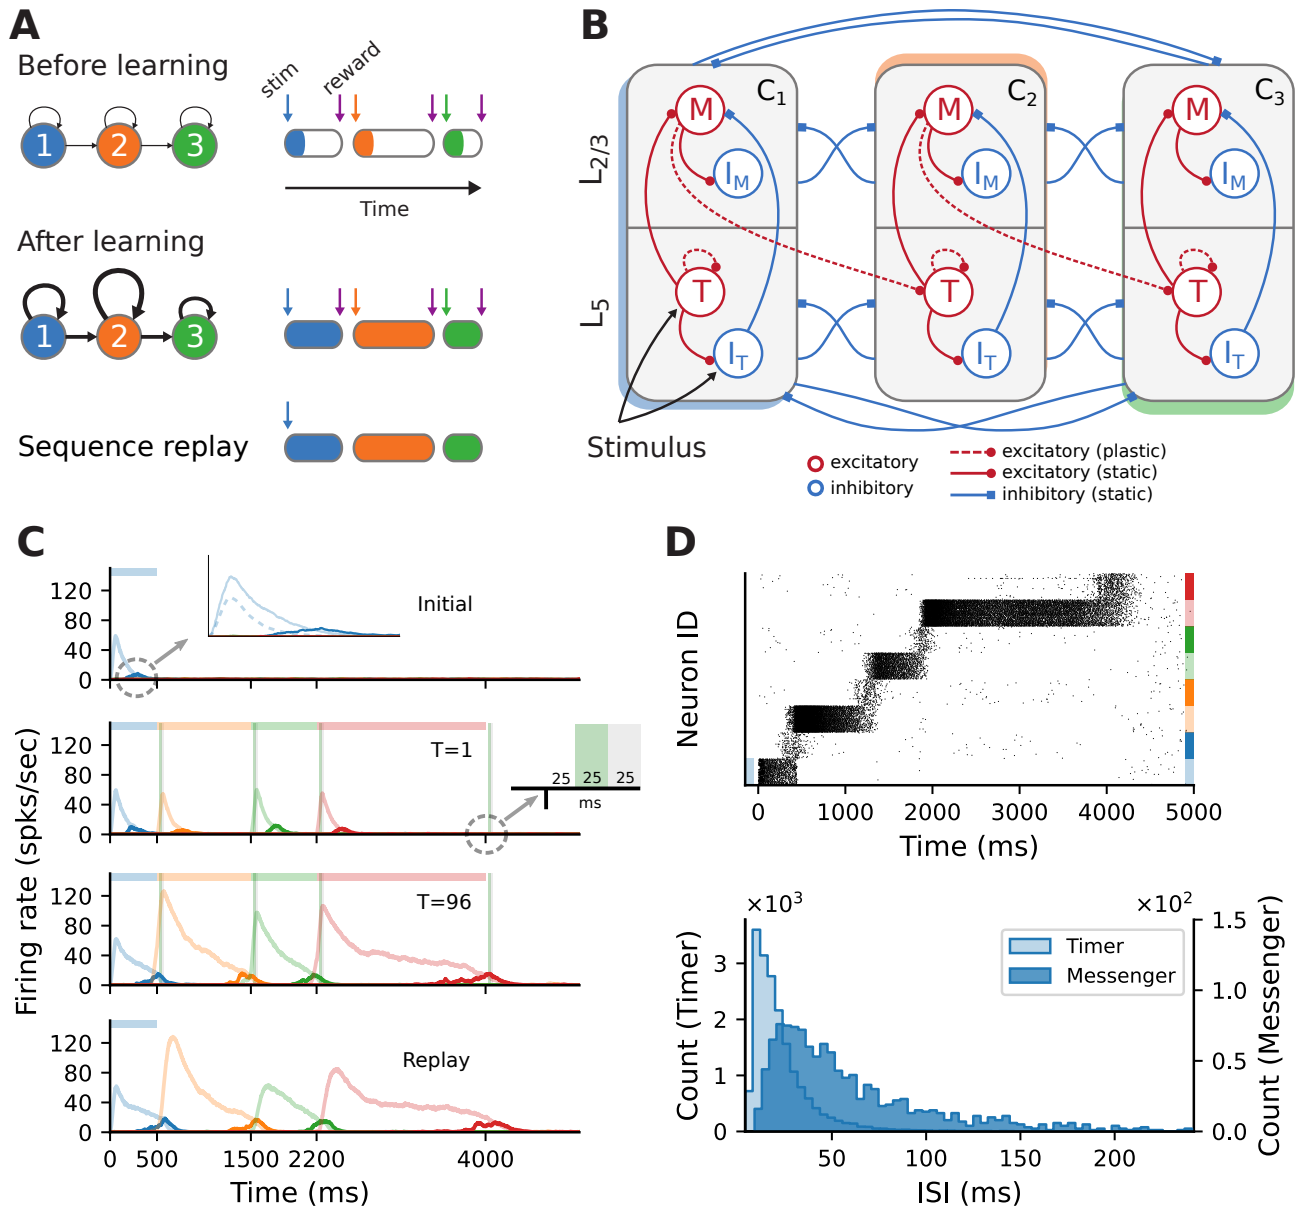

Figure 1: **Sequence learning task and network architecture.** (A) A sequence of three intervals (elements) is learned by a network with as many dedicated populations (columns). The individual populations are stimulated sequentially, with a global reward signal given at the beginning and the end of each element. After training, the recurrent and feedforward weights are strengthened, and the sequence is successfully recalled following a cue. The fullness of the colored sections on the right illustrates the duration of the activity (firing rates) above a certain threshold. (B) Each stimulus-specific column is composed of two excitatory, *Timers* (*T*) and *Messengers* (*M*), and two corresponding inhibitory populations, *I<sub>T</sub>* and *I<sub>M</sub>*. Solid (dashed) arrows represent fixed static (plastic) connections. Cross-columnar inhibition always targets the excitatory population in the corresponding layer (*L<sub>5</sub>* or *L<sub>2/3</sub>*). (C) Firing rates of the excitatory populations during learning (top three plots) and recall (bottom plot) of four time intervals (500, 1000, 700, 1800 ms). Light (dark) colors represent *T* (*M*) cells. Dashed light blue curve in top panel inset shows the inhibitory population *I<sub>T</sub>* in *L<sub>5</sub>*. Green (grey) vertical bars show the 25 ms reward (trace refractory) period, 25 ms after stimulus offset (see inset). (D) Spiking activity of excitatory cells (top) and corresponding ISI distributions (bottom), during recall, for the network in (C). In the raster plot, neurons are sorted by population (*T*, *M*) and sequentially by column (see color coding on the right).

104 and lack of recurrence (see Methods), there is a short window when the net excitation from the Timer cells elicit  
 105 stronger responses from the Messenger cells.

106 During training, when each column is stimulated sequentially, the recurrent Timer projections are strengthened  
 107 such that their responses extend up to the respective reward signal (green vertical bars). At the same time, the  
 108 feedforward projections from the Messenger cells on to the next column are also enhanced, such that upon recall  
 109 (stimulation of first column), they are sufficient to trigger a strong response in the corresponding Timer cells.

110 This chain reaction allows a complete replay of the original sequence, preserving both the order and intervals.  
 111 The activity propagation during recall is illustrated in Figure 1D (see Figure 3S4 in Cone and Shouval, 2021).  
 112 The network displays realistic spiking statistics (coefficient of variation of 1.35 and 0.95 for Timer and Messenger  
 113 cells), with Messenger cells having lower firing rates than Timer cells, roughly consistent with the experimentally  
 114 observed values (Liu et al., 2015).

## 115 2.2 Learning and recall precision

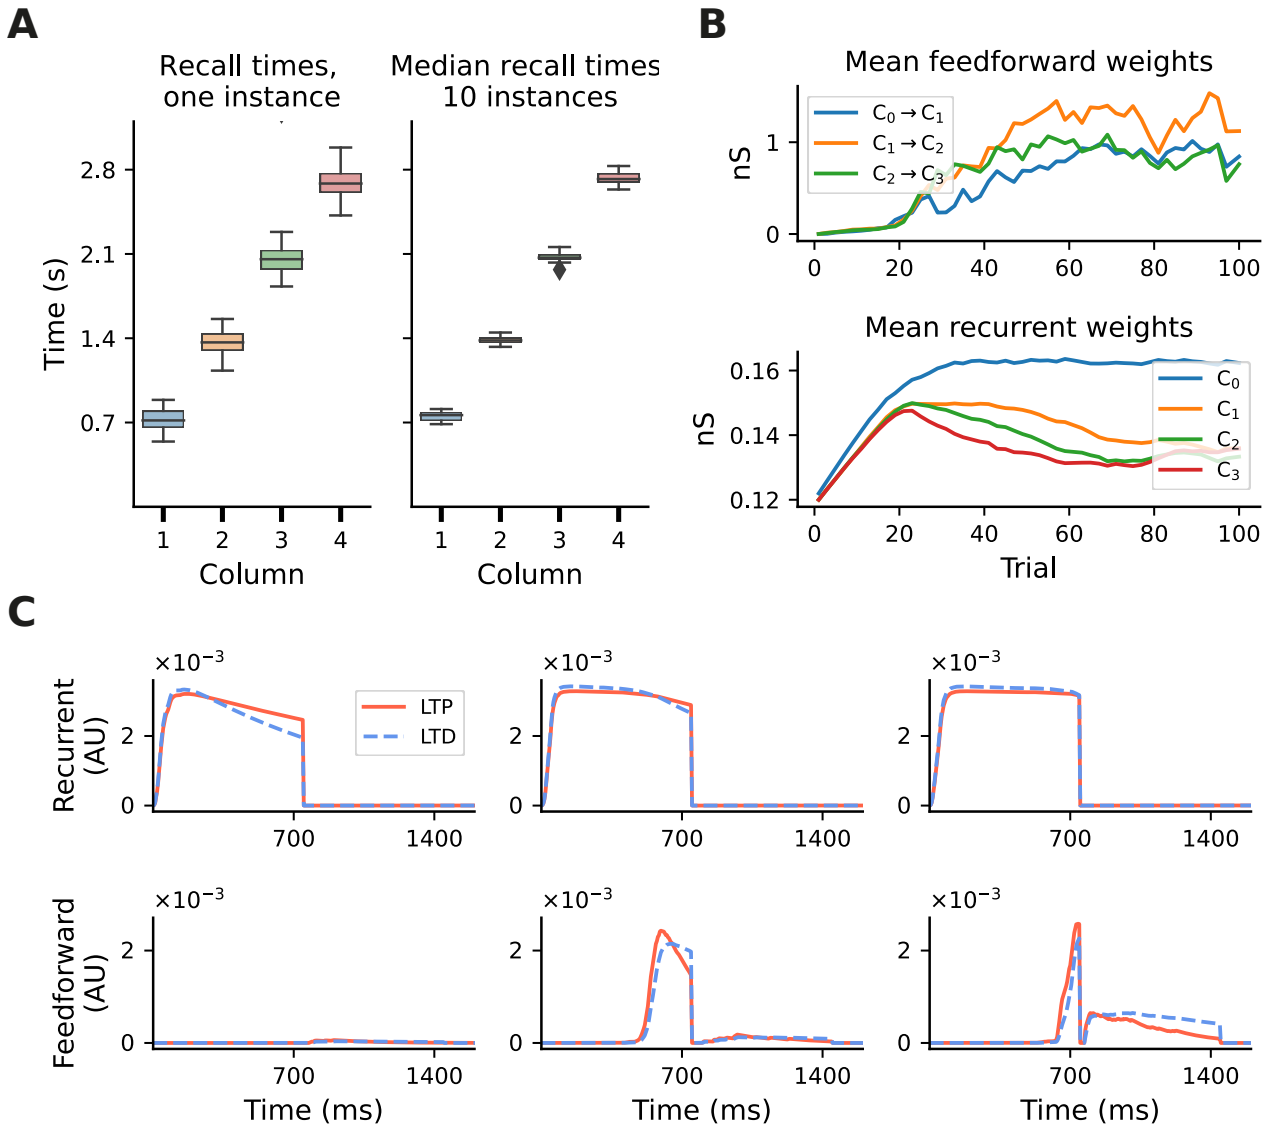

Figure 2: **Accuracy of recall and evolution of learning.** Results shown for a sequence of four intervals of 700 ms. **(A)** Fluctuations in learning and sequence recall. We define *recall time* as the time at which the rate of the Timer population drops below 10 spks/s. Left: recall times for 30 trials after learning, for one network instance. Right: distribution of the median recall times over 10 network instances, with the median in each network calculated over 30 replay trials. **(B)** Mean synaptic weights for feedforward (Messenger to Timer in subsequent columns, top) and recurrent (Timer to Timer in the same column, bottom) connections for one network instance. **(C)** Mean LTP and LTD traces for the recurrent (top) and feedforward (bottom) connections, for learning trials  $T=3$ ,  $T=15$  and  $T=35$  and one network instance.

116 The model exhibits fluctuations in the learning process and recall accuracy of sequences as a consequence of  
 117 noise and the stochastic nature of spiking networks. For sequences of intermediate length, the recall times  
 118 typically vary within  $\pm 10\text{-}15\%$  of the target duration (see Figure 2A, left). However, this range depends on  
 119 several parameters, and generally increases with duration or sequence length (see Supplementary Figure S1).

120 Nevertheless, averaged over multiple network instances, these effects are attenuated and learning becomes more  
121 precise (Figure 2A, right).

122 These fluctuations can also be observed at the level of synaptic weights. Whereas the recurrent weights in the  
123 Timer populations converge to a relatively stable value after about 70 trials (see Figure 2B, bottom panel, and  
124 Figure 3S2 in Cone and Shouval, 2021), the feedforward weights display a larger variability throughout training  
125 (top panel). For the recurrent connections, convergence to a fixed point in learning can be formally demonstrated  
126 (see proof in Cone and Shouval, 2021). As a Hebbian learning rule (see Methods), the two competing LTP and  
127 LTD eligibility traces are activated upon recurrent activity in the Timer population. Assuming that both traces  
128 saturate quickly, with a slightly higher LTD peak, and given a larger time constant for the LTP trace, the LTD  
129 trace will decay sooner, resulting in the facilitation of recurrent synapses during the reward period (Figure 2C,  
130 top panel). Learning converges when the net difference between the two traces is zero at the time of reward.

131 For the feedforward weights, an analytical solution is more difficult to derive. Due to Hebbian co-activation of  
132 Messenger cells and Timer cells in the subsequent module, the traces are activated (non-zero) shortly before the  
133 reward period, temporarily reset following reward, and reactivated during the next trial (Figure 2C, bottom panel).  
134 The net weight change is thus the sum of trace differences over two subsequent reward periods. Empirically,  
135 learning nevertheless tends to converge to some relatively stable value if feedforward projections only exist  
136 between columns coding for subsequent input elements. However, because the reward signal is globally available  
137 at each synapse, all projections from a Messenger population to any other module could, in theory, be facilitated,  
138 as long as there is some temporal co-activation. We elaborate on this aspect in Section 2.5.

## 139 2.3 Model robustness

140 Although formally learning convergence is only guaranteed for the recurrent Timer connections, Cone and  
141 Shouval (2021) report that in practice the model behaves robustly to variation of some connectivity and learning  
142 parameters. However, the range of parameter values and sequence lengths analyzed in Cone and Shouval (2021)  
143 (see their Figure 5 and supplements) does not give a complete account of the parameters' influence and the  
144 model's limits. To test model robustness more thoroughly, we varied a number of the synaptic weights and  
145 learning parameters beyond those considered in the original work, and measured the consistency in the recall  
146 times of a sequence composed of four 700 ms intervals.

147 First, we varied the excitatory and inhibitory projections onto Messenger cells within a column, in an interval of  
148  $\pm 20\%$  of their baseline value. This is the range explored in Cone and Shouval (2021) (see their Figure 5), but only  
149 qualitative results of the population activities were reported and only for a subset of all possible combinations.  
150 In the baseline network, on average 17 out of 50 reported recall times were off by  $\pm 140$  ms (or 20% of correct  
151 interval) when measured relative to their expected onset time, whereas these values varied between 15 and 22 for  
152 the tested parameter configurations (see Figure 3A, top left). Averaged across all four columns, the outliers  
153 decreased to a range between 11-15 (Figure 3A, bottom left). Next, we used a modified z-score based on the  
154 median absolute deviation (Iglewicz and Hoaglin, 1993) to evaluate the distribution of the absolute recall times  
155 (not relative to their expected onset). These were centered closely around the mean recall time in each column,  
156 with the number of outliers decreasing significantly to below 1.5 (3% of recall trials, Figure 3A, right). These  
157 results suggest that the recall times are relatively consistent for each column (narrowly distributed), but the  
158 absolute deviations from the expected values increase with the element's position in the sequence.

159 In other words, the errors and variability accumulate with sequence length, with the network being particularly  
160 sensitive to the weaker excitatory connections from Timer onto Messenger cells (see  $\Delta w = -20\%$  for  $T \rightarrow M$ ).  
161 In fact, these errors manifest in recalling increasingly shorter intervals (Figure 3B, left), with the last column  
162 reporting on average close to 600 ms instead of 700 ms. Averaged across all columns, the median recall time  
163 is more accurate. Similar results are obtained for variations in the inhibitory projections between columns  
164 (Figure 3B, right).

165 The model displays similar robustness to variations in the eligibility trace time constants ( $\tau^p, \tau^d, \tau_{\text{ff}}^p, \tau_{\text{ff}}^d$ ) and  
166 the variables scaling the Hebbian contribution to the trace dynamics ( $\eta^p, \eta^d, \eta_{\text{ff}}^p, \eta_{\text{ff}}^d$ , see Methods). Whereas  
167 in the original work this analysis was performed with a sequence of two elements of 500 ms each (see Figure  
168 5 - supplement 1 in Cone and Shouval, 2021), here we use a sequence of four 700 ms elements. Compared to  
169 the baseline network (Figure 3C, left), where the median recall time decays only slightly with sequence length,  
170 randomizing the learning parameters in each learning trial not only increases the median recall time across all  
171 columns, but it also leads to a greater variability in the replayed sequences (Figure 3C, center). Randomizing  
172 the learning parameters once per network instance does, on average, lead to results closer to the baseline case,

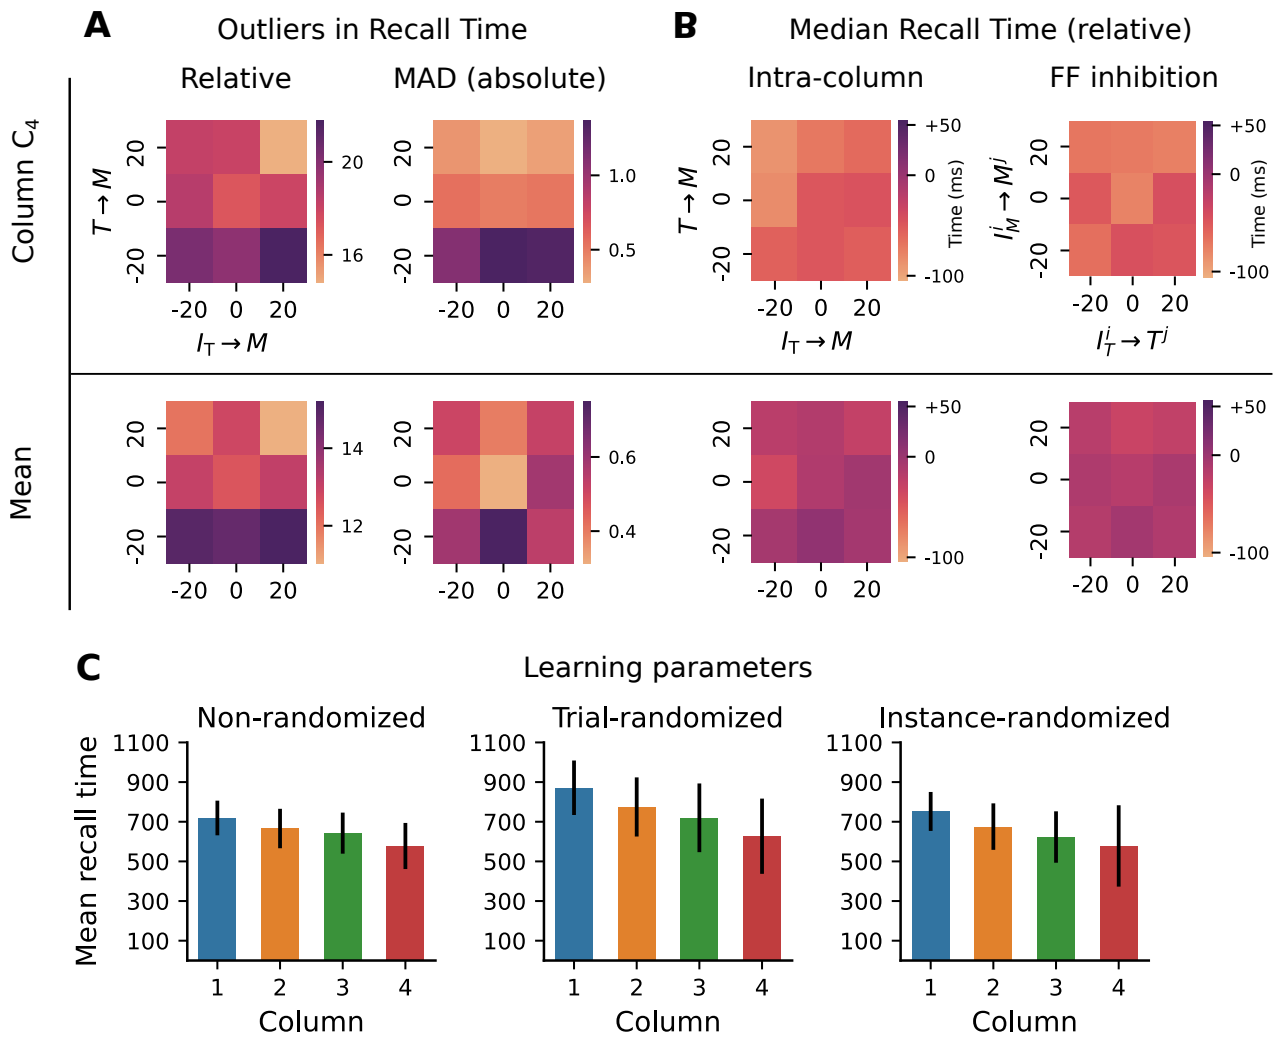

Figure 3: **Robustness to variation in synaptic weights and learning parameters.** The system was trained on a sequence of four elements, each with a duration of 700 ms. For the Timer cells, we define *relative recall time* as the recall time relative to stimulation onset, i.e., the time from the expected onset time (0, 700, 1400, 2100) in the sequence until the rate drops below a threshold of 10 spks/s. Conversely, *absolute recall time* is simply the time when the rate drops below threshold (relative to 0). **(A)** Number of outlier intervals reported during 50 recall trials, as a function of the percentage change of two synaptic weights within a column: excitatory Timer to Messenger, and inhibitory  $I_T$  to Messenger. Top row shows the number of outliers, defined as a deviation of  $\pm 140$  ms from the correct interval relative to expected onset (left), and the number of outliers detected using a modified z-score (threshold  $> 3$ , right panel) based on the median absolute deviation in column  $C_4$  (see main text). Bottom row shows the respective outliers averaged over all four columns. **(B)** Deviation of the median recall time from the expected 700 ms, as a function of the excitatory and inhibitory synaptic weights onto the Messenger cells in a column (left), and as a function of the cross-columnar ( $C_i \neq C_j$ ) inhibitory synaptic weights within the same layers (right). Top and bottom row as in **(A)**. All data in **(A)** and **(B)** is averaged over 20 network instances. **(C)** Mean recall time of a four-element sequence of 700 ms intervals, over 50 recall trials of a single network instance. Left: baseline network. Center: during each training trial, the learning parameters (see main text) are drawn randomly and independently from a distribution of  $\pm 20\%$  around their baseline value. Error bars represent the standard deviation. Right: the set of learning parameters is drawn randomly once for each network instance, with data shown averaged over 10 instances.

173 but further increases the recall variability in the last column (Figure 3C, right - analysis not performed in Cone  
174 and Shouval, 2021).

175 These results demonstrate that the system copes well with intermediate perturbations to the baseline parameters  
176 with respect to the afferent weights for the Messenger population, the cross-columnar inhibition and the learning  
177 rule variables.

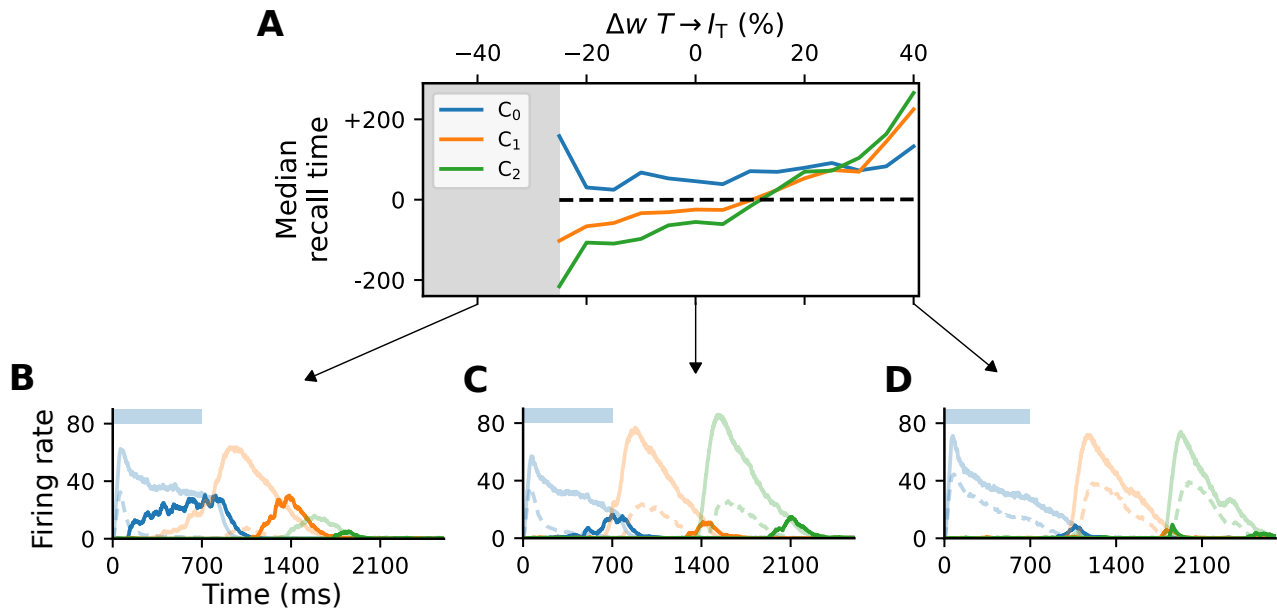

Figure 4: **Activity of  $L_5$  inhibitory population is critical for accurate learning.** (A) Deviation of the median recall time of three intervals of 700 ms, as a function of the change in synaptic weights  $T \rightarrow I_T$  relative to baseline ( $\Delta w = 0$ ). Grey area ( $< -25\%$ ) marks region where learning is unstable (not all elements can be recalled robustly). Data is averaged over 5 network instances. (B-D) Characteristic firing rates during recall for values deviations of  $-25$ ,  $0$  and  $40\%$  relative to baseline. Solid curves represent the excitatory populations as in Figure 1, while dashed curves indicate the respective inhibitory populations  $I_T$  in  $C_i$ .

178 While the Timer and Messenger cells are responsible for maintaining a sequence element in the activity and  
 179 signaling the onset of subsequent ones, the dynamics of the inhibitory populations orchestrates the timing of  
 180 the individual components. For example, through their characteristic activity curve, the inhibitory cells in  
 181  $L_5$  simultaneously control the activity of the Messenger cells in their own column and the onset of the Timer  
 182 populations in the next column. By modifying the synaptic weight from the Timer cells to the inhibitory  
 183 population in their column ( $w_{T \rightarrow I_T}$ ), and thus controlling direct excitation, we sought to understand how these  
 184 inhibitory cells impact learning.

185 For values significantly lower than baseline ( $< -25\%$ , grey area in Figure 4A), the network fails to recall sequences  
 186 in a reliable manner (Figure 4B), in particular sequences containing more than two elements. In addition, the  
 187 recall times vary significantly across the columns in the case of reduced weights. As the weights increase, the  
 188 stronger net excitation causes longer-lasting inhibition by  $I_{L_5}$ , delaying the activation of the Messenger cells  
 189 (Figure 4C). This leads to an over-estimation of the elements' duration, which increases with the element's  
 190 position in the sequence (up to  $+200$  ms for  $\Delta w_{T \rightarrow I_T} = 40\%$ , Figure 4D).

191 Although these observations suggest a robust learning mechanism, they also indicate an intrinsic and consistent  
 192 bias of the model for reporting increasingly shorter intervals and larger variability in the recall times of longer  
 193 sequences.

## 194 2.4 Model scaling

195 In the previous section we investigated the sensitivity of the model to the choice of synaptic weights, but a  
 196 broader definition of robustness also encompasses invariance to the size of the different populations. Ideally, the  
 197 model should retain its dynamical and learning properties also for larger network sizes, without the need for  
 198 manual recalibration of the system parameters. In balanced random networks, increasing the network size by a  
 199 factor of  $m$  and decreasing the synaptic weights by a factor of  $\sqrt{m}$  should maintain the activity characteristics  
 200 (van Vreeswijk and Sompolinsky, 1998; Litwin-Kumar and Doiron, 2012; van Albada et al., 2015). The model  
 201 studied here differs significantly from these systems with respect to features such as the ratio of excitation and  
 202 inhibition (1:1, not 4:1), or strong recurrent connectivity in the small  $N$  regime, which results in significant  
 203 fluctuations driven by noise. Furthermore, the stereotypical activation patterns underlying sequence learning  
 204 and replay are significantly more complex. These considerations suggest that successful scaling may require



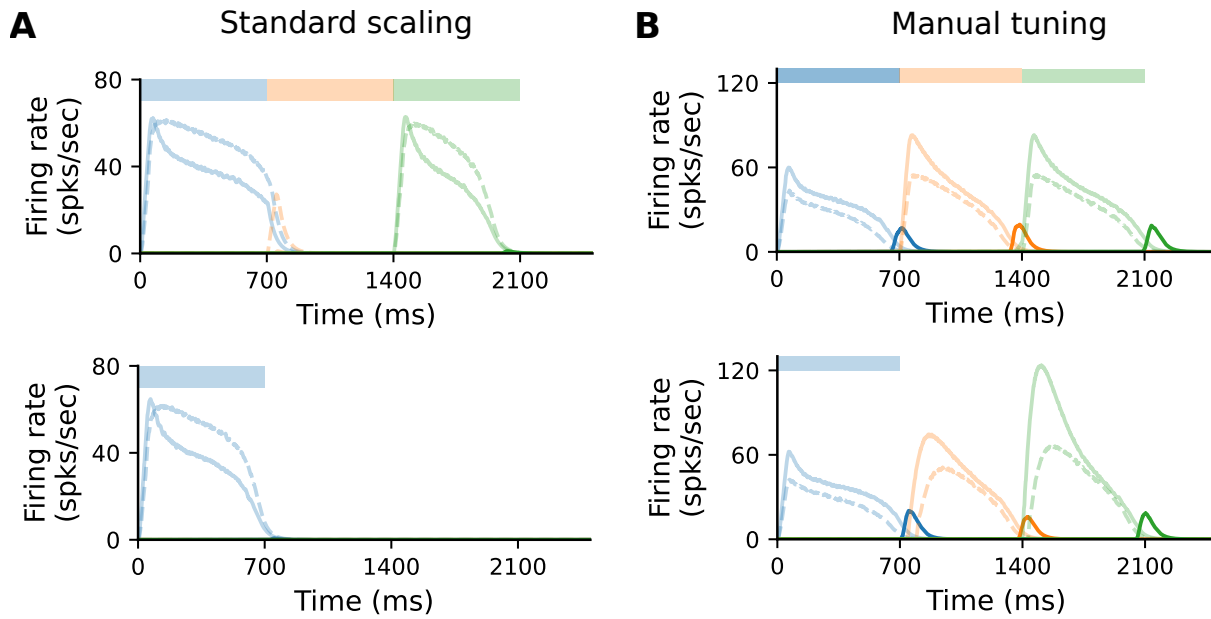

Figure 5: **Scaling the model requires manual retuning of parameters.** (A) Characteristic firing rates during training (top) and recall (bottom) of a sequence composed of three 700 ms intervals, in a larger network where each population is composed of  $N' = 400$  cells. All static weights have been scaled down by  $1/\sqrt{N'/N}$  (see Methods). Solid curves show Timer (light) and Messenger (dark) cells, dashed curves  $I_T$  cells. (B) As in (A), with further manual tuning of specific weights. For details, see Methods and Supplementary Material.

205 additional modifications of the connectivity.

206 In the original formulation of the model, each population (Messenger, Timer, inhibitory) consists of 100 neurons.  
 207 To study how well the model scales for  $N' = 400$ , we kept all parameters unchanged and scaled all non-plastic  
 208 weights by  $1/\sqrt{N'/N}$  (see Supplementary Table S4). Under such standard scaling, the system fails to learn  
 209 and recall sequences (Figure 5A), primarily due to the high firing rates of  $I_T$  cells. These decay slower than the  
 210 corresponding Timer cells, inhibiting the Timer population in the subsequent column and thus prohibiting a  
 211 correct sequential activation during training.

212 Nevertheless, it is possible to find a set of parameters (see Methods and Supplementary Table S4) for which  
 213 learning unfolds as expected; this is illustrated in Figure 5B. The critical component here is the activity of  $I_T$   
 214 (see also Figure 4). This must fulfil three criteria: first, it must decay slightly faster than the rate of the Timer  
 215 population in the same column; second, it must sufficiently inhibit the Timer populations in all other columns  
 216 to enable a WTA dynamics; third, the WTA inhibition of the Timer populations must be weak enough that  
 217 they can still be activated upon stimulation. One way to achieve this is by further decreasing the local weights  
 218  $w_{T \rightarrow I_T}$  within a column and the cross-columnar inhibition  $w_{I_T^i \rightarrow T^j}$ . This indicates that, given the right set of  
 219 parameters, the dynamics underlying the learning process are independent of the network size. Although it is  
 220 outside the scope of this work, scaling can be likely achieved for a wider range of model sizes, as long as the core  
 221 properties described above are retained.

## 222 2.5 Projections between all columns

223 In the original implementation of Cone and Shouval (2021), and in contrast to the description in the paper,  
 224 excitatory projections between columns were only allowed in a feedforward manner, thus hard-wiring the order  
 225 of the sequence elements. Since such a predetermined and stimulus-dependent connection pattern weakens the  
 226 model's claims of biological plausibility, we probed the model's ability to learn when this constraint was relaxed.

227 To this end, we extended the baseline network with additional projections from Messenger cells in column  $C_i$  to  
 228 Timer cells in all other columns  $C_j$ , ( $i \neq j$ ) as depicted in Figure 6A. As the weights of these projections are  
 229 initialized close to 0, no further measures were necessary to maintain the same activity level as the baseline  
 230 network. Although learning initially proceeded as before, the activity soon lost its stereotypical temporal  
 231 structure and the learning process is corrupted (Figure 6B). After only a few dozen trials, the activation order of

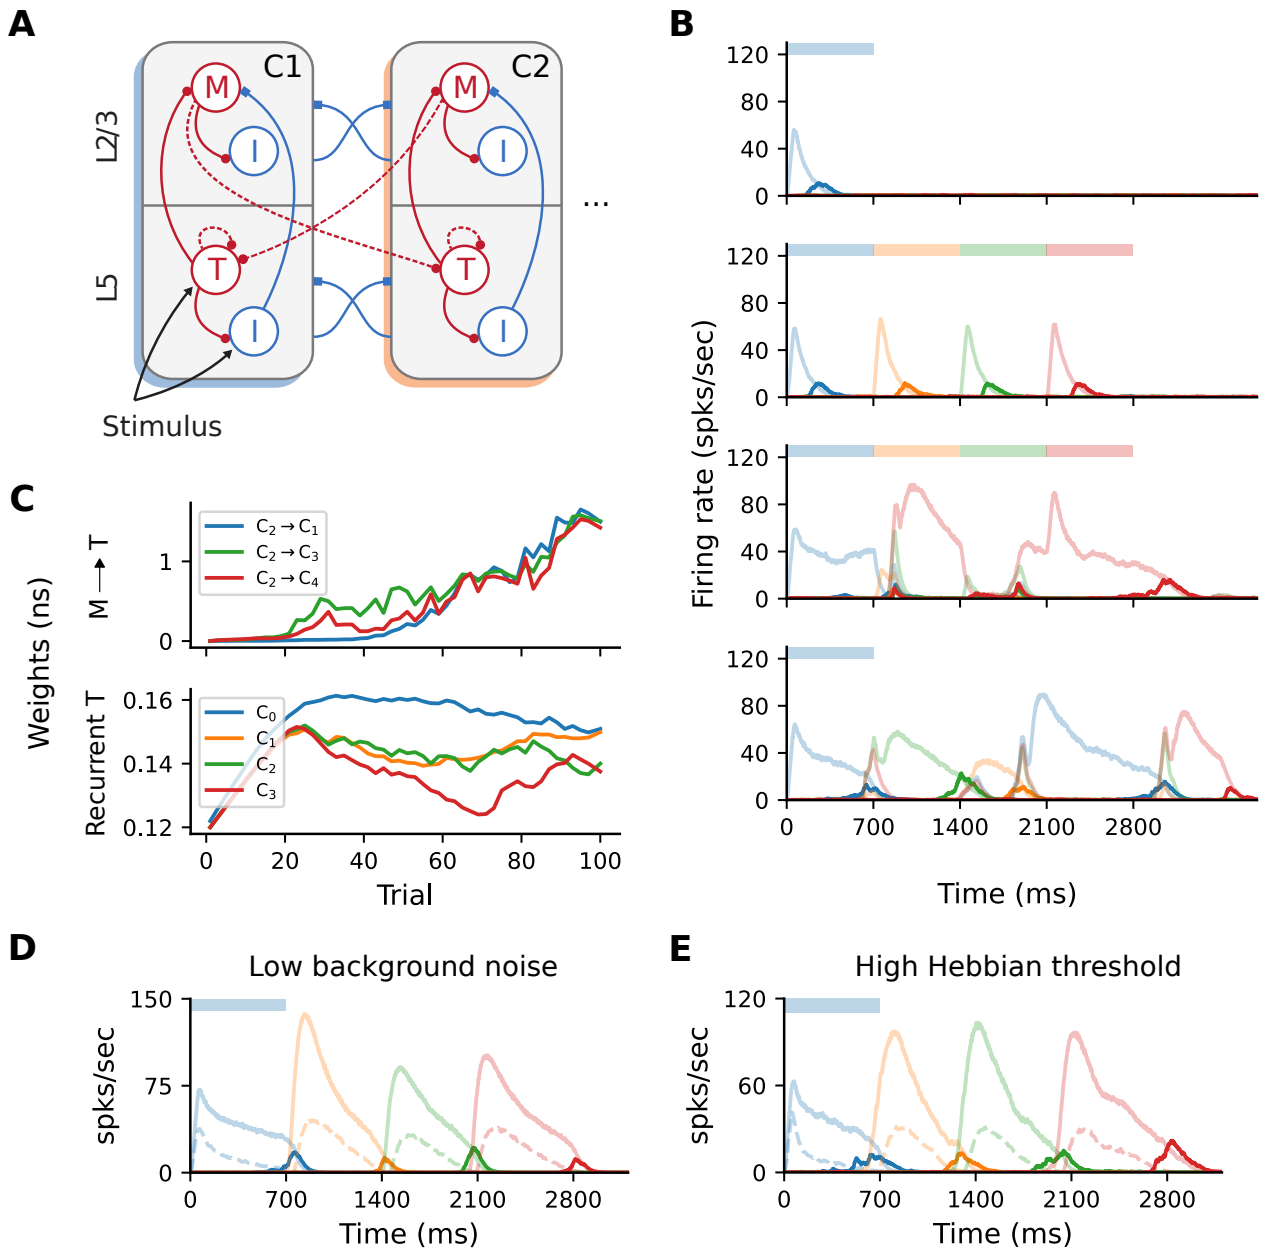

Figure 6: **All-to-all cross-columnar excitation prohibits learning.** (A) Extending the original architecture described in Figure 1B,  $M \rightarrow T$  connections exist between all columns  $C_i \rightarrow C_j$  ( $i \neq j$ ) and are subject to the same plasticity. (B) Firing rates of the excitatory populations during learning and recall of four time intervals (each 700 ms). Initially, learning evolves as in Figure 1C, but the activity becomes degenerated and the sequence can not be recalled correctly (lower panels). (C) Evolution of the cross-columnar (from  $C_2$ , top panel) and recurrent Timer synaptic weights (bottom panel). The transition to the next sequence cannot be uniquely encoded as the weights to all columns are strengthened. (D) Sequence recall after 100 training trials in a network with a low background noise (50% of the baseline value,  $1/2\sigma_\xi$ ). (E) Sequence recall after 100 training trials in a network with a higher Hebbian activation threshold for the cross-columnar projections  $r_{th}^{ff} = 30$  spks/sec (instead of the baseline 20 spks/sec).

232 the columns did not match the stimulation, with multiple populations responding simultaneously. Such random,  
 233 competitive population responses also continued throughout the recall trials.

234 This behavior arises because projections from the Messenger cells to all columns are incorrectly strengthened, not  
 235 just between subsequent ones reflecting the order of the input sequence. Figure 6C illustrates such an example,  
 236 with synaptic weights from Messenger cells in  $C_2$  to all other columns  $C_j$  being equally strengthened, instead of  
 237 only to  $C_3$ . Naturally, this effect is detrimental because Messenger cells can activate multiple Timer populations  
 238 at once, introducing a stochasticity in the network that abolishes the unique sequential activation required for

239 accurate learning and recall. In other words, the physical pathway encoding the transitions between sequence  
 240 elements can not be uniquely traced out as in the baseline network.

241 According to the Hebbian-based plasticity rule (see Methods), synaptic weights are modified during the reward  
 242 period only if there is a co-activation of the pre- and postsynaptic neurons. This means that connections  
 243 from  $M$  cells in a column  $C_i$  to  $T$  cells in any  $C_j$  may be strengthened if there is temporal co-activation of  
 244 the two populations. While this is the intended behavior for subsequent columns  $C_i$  and  $C_{i+1}$ , Timer cells in  
 245 other columns may also spike due to the background noise, thereby enhancing the corresponding connections.  
 246 Obviously, in the pre-wired (baseline) network this is not an issue, as only subsequent columns are connected.

247 One straightforward solution to overcome this problem is to reduce the background noise below the spiking  
 248 threshold, thereby ensuring that only the stimulated populations are active and no "cross-talk" occurs through  
 249 spurious spiking. Doing so allows the network to regain its functional properties (Figure 6D), pending some  
 250 minor additional parameter tuning (see Methods). However, from the point of view of biological plausibility, this  
 251 has the disadvantage that neurons spike exclusively during their preferred stimulus.

252 Alternatively, it is possible to compensate for the low-rate spontaneous spiking by raising the activation threshold  
 253 for the Hebbian term,  $r_{th}^{ff}$  (see Methods). For instance, increasing from the baseline value of 20 to 30 spks/sec  
 254 is sufficient to ensure that only the stimulated populations reach these rates. Thus, only synapses between  
 255 stimulated populations are modified, and the learning process is not affected (Figure 6E). The role and plausibility  
 256 of such thresholds is detailed in the Discussion.

## 257 2.6 Alternative wiring with local inhibition

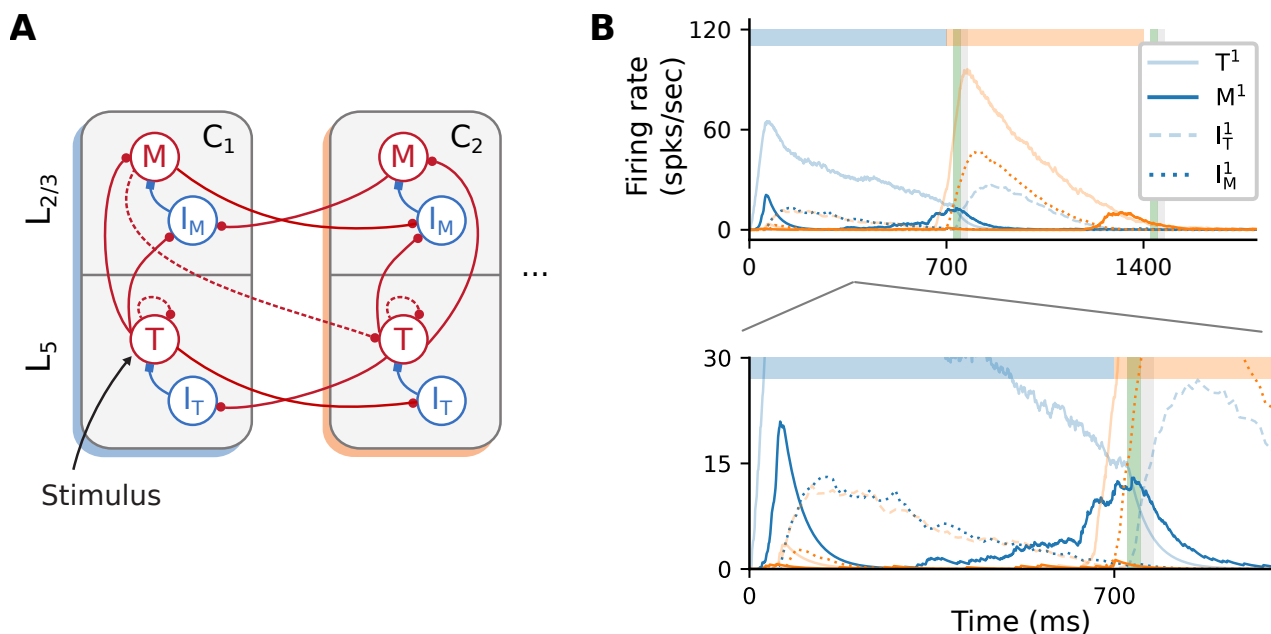

Figure 7: **Alternative wiring with local inhibition and only excitatory cross-columnar projections.** (A) Architecture with local inhibition functionally equivalent to Figure 1B. Inhibitory projections are now local to the column, and feedforward inhibition is achieved via cross-columnar excitatory projections onto the  $I$  populations. (B) Recall of a sequence composed of two 700 ms intervals. Inset (bottom panel) zooms in on the activity at lower rates. As before, color codes for columns. Color shade represents populations in  $L_5$  (light) and  $L_{2/3}$  (dark), with solid curves denoting excitatory populations. Dashed (dotted) curves represent the inhibitory cells  $I_T$  ( $I_M$ ).

258 Unlike cortical circuits, where inhibition is assumed to be local (Douglas and Martin, 2004; Fino and Yuste,  
 259 2011; Tremblay et al., 2016), the original architecture described in Figure 1B relies on (long-range) inhibitory  
 260 projections between columns to ensure a soft WTA mechanism in the presence of background activity. This aspect  
 261 is briefly discussed in Cone and Shouval (2021), and the authors also propose an alternative, biologically more  
 262 plausible and functionally equivalent network architecture (see their Figure 9). As schematically illustrated in  
 263 Figure 7A, cross-columnar inhibition can be replaced by local inhibition and corresponding excitatory projections

264 onto these circuits. In contrast to the baseline network, where both Timer and inhibitory cells in  $L_5$  were  
265 stimulated, here only Timer cells received input. Otherwise, excitation onto  $I_T$  would soon silence the Timer  
266 cells, prohibiting the longer timescales required for encoding the input duration.

267 As a proof-of-concept, we empirically derived a set of parameters (see Supplementary Table S5) for such a  
268 circuit and found that the core network dynamics and learning process can, in principle, be retained (Figure 7B).  
269 However, a significant discrepancy from the baseline behavior concerns the initial transient of the Messenger  
270 cells in the first column  $C_1$  (solid, dark blue curve in Figure 7B, bottom panel). This occurs because inhibition  
271 onto the Messenger cells from  $I_M$  (dotted, dark blue curves) is slower (due to higher firing threshold) than the  
272 excitation from the Timer cells. This results in a brief period of higher Messenger activity before inhibition takes  
273 over and silences it. Although this behavior is different from the baseline model, it does not appear to impact  
274 learning, and it is in fact consistent with the experimental data from the primary visual cortex (Liu et al., 2015).

## 275 3 Discussion

276 Given that the ability to learn and recall temporal sequences may be a universal functional building block of  
277 cortical circuits, it is paramount that we understand how such computational capacities can be implemented  
278 in the neural substrate. While there have been numerous approaches to model sequence processing in spiking  
279 networks, many of these are either unable to capture important functional aspects (e.g., order and duration of  
280 sequences), or rely on biophysically unrealistic assumptions in their structure or learning rules. In this work we  
281 investigated a recent model proposed by Cone and Shouval (2021), which attempts to overcome these weaknesses.  
282 Since here we focused particularly on the reproducibility and replicability aspects, our work provides only  
283 limited improvements over the original model. Thus, major modifications such as changes to the learning rule  
284 or the evaluation of more complex sequence learning tasks are beyond the scope of our study. However, by  
285 re-implementing the model in the NEST simulator, we were able to qualitatively replicate the main findings of  
286 the original work, find some of the critical components and assumptions of the model, and highlight its strengths  
287 and limitations. More importantly, we provide a complete set of parameters and implementation details for a full  
288 replication of the model. As computational studies are becoming increasingly significant across many scientific  
289 disciplines, ease of reproduction and replication becomes an ever more important factor, not just to allow efficient  
290 scientific progress, but also to ensure a high quality of the work. These points are well illustrated by a notable  
291 outcome of this study: as a result of our findings, the authors of the the original study have modified their  
292 published code to enable full replication and correct the inconsistencies and errors discovered in their work, as  
293 listed below.

### 294 3.1 Reproducibility

295 The original model is described in Cone and Shouval (2021), with most parameters provided as Supplementary  
296 Information, along with a publicly available MATLAB implementation on ModelDB <sup>1</sup>. However, while the results  
297 are reproducible using the provided implementation in the  $R^3$  sense described by Benureau and Rougier (2018),  
298 a successful replication in the  $R^5$  sense would not have been possible based solely on the information in the  
299 manuscript and Supplementary Tables, given that a number of parameters are either under-specified or omitted  
300 entirely. Table 1 and Table 2 give an overview of the more important discrepancies between the description and  
301 original implementation, categorized by the their relevance and type of mismatch.

302 Table 1 lists omitted (or inaccurately stated) critical parameters, i.e. those that are necessary for the model  
303 to carry out the computational tasks that are central to the original study. Such oversights are particularly  
304 problematic, as they not only make replication more challenging, but also make implicit model assumptions  
305 opaque. An illustrative example of an omitted critical parameter is the spiking threshold for the inhibitory  
306 neurons,  $V_{th}$ , which is 5 mV higher than the threshold for the excitatory neurons. This is important, as it results  
307 in the inhibitory rates decaying slightly faster than the Timer cells, thus activating the Messenger cells at the  
308 appropriate time. In the absence of this dynamical feature, learning fails (see for example Figure 5A). While  
309 there is some experimental evidence for such a difference in the spiking threshold, it varies significantly across  
310 different cell types and recording locations (Tripathy et al., 2015). Similarly, the activation thresholds for the  
311 Hebbian learning,  $r_{th}$ , are necessary to ensure that spontaneous spiking resulting from the neuronal noise does  
312 not lead to potentiation of unwanted synapses, in particular if connections between all columns are allowed  
313 (see Figure 6). Without such thresholds, learning still converges in the baseline network, but the fixed point of

---

<sup>1</sup><http://modeldb.yale.edu/266774>

| Critical parameters    |                                  |                                                                      |
|------------------------|----------------------------------|----------------------------------------------------------------------|
| Name                   | Value                            | Description                                                          |
| $V_{th}^I$             | -50 mV                           | Spiking threshold for inhibitory neurons $\ominus$                   |
| $r_{th}$               | 10 Hz                            | Hebbian activation threshold (recurrent connections) $\ominus$       |
| $r_{th}^{ff}$          | 20 Hz                            | Hebbian activation threshold (feedforward connections) $\ominus$     |
| $T_{max}^p$            | 0.0033                           | Saturation level of LTP trace (recurrent connections) $\otimes$      |
| $T_{max}^d$            | 0.00345                          | Saturation level of LTD trace (recurrent connections) $\otimes$      |
| $T_{max}^{p,ff}$       | 0.0034                           | Saturation level of LTP trace (feedforward connections) $\otimes$    |
| $T_{max}^{d,ff}$       | 0.00345                          | Saturation level of LTD trace (feedforward connections) $\otimes$    |
| $\eta^p$               | $45 \times 3500 \text{ ms}^{-1}$ | Activation rate of LTP trace (recurrent connections) $\otimes$       |
| $\eta^d$               | $25 \times 3500 \text{ ms}^{-1}$ | Activation rate of LTD trace (recurrent connections) $\otimes$       |
| $\eta_{ff}^p$          | $20 \times 3500 \text{ ms}^{-1}$ | Activation rate of LTP trace (feedforward connections) $\otimes$     |
| $\eta_{ff}^d$          | $15 \times 3500 \text{ ms}^{-1}$ | Activation rate of LTD trace (feedforward connections) $\otimes$     |
| $\tau_{syn}^{exc,inp}$ | 10 ms                            | Excitatory synaptic time constant of the input connections $\ominus$ |

Table 1: Critical parameters necessary for accurate learning. Symbols denote different discrepancy types:  $\ominus$  represents parameters not mentioned in the study, and  $\otimes$  parameters with only relative but no exact values given.

| Parameter values required for numerical reproducibility |                       |                                                                                     |
|---------------------------------------------------------|-----------------------|-------------------------------------------------------------------------------------|
| $w_{in}$                                                | 100 nS                | Weights of input connections $\ominus$                                              |
| $\sigma_\xi$                                            | $\mathcal{N}(0, 100)$ | Gaussian white noise in the neuron model $\ominus$                                  |
| $d_{reward}$                                            | 25 ms                 | Delay of reward signal relative to the onset of the next sequence element $\ominus$ |
| $\tau_{syn}^{exc}$                                      | 80 ms                 | Excitatory synaptic time constant (EE and IE) within the network $\diamond$         |
| $\tau_{syn}^{inh}$                                      | 10 ms                 | Inhibitory synaptic time constant (EI) $\diamond$                                   |
| $\tau_{ref}$                                            | 3 ms                  | Refractory period $\diamond$                                                        |
| $\varphi$                                               | 0.26                  | Connection density for all connections (including recurrent) $\diamond$             |
| $\nu_{in}$                                              | 30 Hz                 | Rate of the Poisson input $\diamond$                                                |
| $\eta$                                                  | 0.16                  | Learning rate for recurrent connections $\diamond$                                  |
| $\eta_{ff}$                                             | 20                    | Learning rate for feedforward connections $\diamond$                                |

Table 2: Parameter values needed for obtaining numerically similar results to those reported in Cone and Shouval (2021). Symbols  $\ominus$  and  $\otimes$  as in Table 1. Additionally,  $\ominus$  denotes parameters with no specific values given, while  $\diamond$  denotes a mismatch between the values reported in the paper and the ones used in the reference implementation.

314 the feedforward weights is shifted, stabilizing at a lower value than in the baseline system (see Supplementary  
315 Figure S2). Therefore, the role and optimal value for the thresholds likely depends on the amount of noise and  
316 spontaneous activity in the network.

317 A further example is the parameterization of the eligibility traces. Whereas the time constants of the eligibility  
318 traces determine their rise and decay behavior, the saturation levels  $T_{max}^\alpha$  can profoundly impact learning. For  
319 the Timer cells, although their exact values (not provided in the original work) is not essential, the order of  
320 magnitude is still critical; they must be carefully chosen to ensure that the traces saturate soon after stimulus  
321 onset, and the falling phase begins before the next reward period (see also Huertas et al., 2015). In other words,  
322 even though the parameter space is underconstrained and multiple values can lead to accurate learning Huertas  
323 et al. (2016), these nevertheless lie within a restricted interval which is difficult to determine given only the  
324 relative values as in the original work: for instance, a value of  $T_{max}^d = 1$  and  $T_{max}^d = 0.95$  will lead to an abrupt

325 increase in the recurrent Timer weights and learning fails. If the traces do not saturate, learning becomes  
326 more sensitive to the trace time constants and the range of time intervals that can be learned with one set of  
327 parameters shrinks significantly. Moreover, the excitatory input synapses have a shorter time constant of 10 ms  
328 than in the rest of the network, which is required for the fast initial ramp-up phase of the Timer cell activity.

329 Table 2 summarizes other, less critical parameters, which are nonetheless necessary to achieve qualitatively  
330 similar activity levels to those presented in the original work. These include input related parameters (input  
331 weights, input rate), as well as the neuronal noise. Whereas some of these discrepancies are due to omission  
332 (e.g., noise) or mismatch between the reported and used values (e.g., learning rate), others arise from tool- and  
333 implementation particularities. For instance, for  $N = 100$  the random number generation in MATLAB results in  
334 an effective connectivity  $\varphi \approx 0.26$  instead of the 0.3 reported in Cone and Shouval (2021), while the effective  
335 refractory period is 3 instead of 2 ms, as threshold crossings are registered with a delay of one simulation step.  
336 Although these parameters influence the level of the activity in the network, they do not directly impact the  
337 learning process; the key computational features claimed for the model are maintained.

### 338 3.2 Learning cross-columnar projections

339 One of the key properties of the model is the ability to learn the order of temporal sequences, achieved by  
340 learning the transitions between stimulus-specific populations encoding the sequence elements. However, Cone  
341 and Shouval (2021) state that "Messenger cells can only learn to connect to (any) Timer cells outside of their  
342 column", which we interpret as an assertion that Timer cells make connections to Messenger cells in all other  
343 columns. In practice, the authors' reference implementation restricts these to subsequent columns only. This  
344 means that the order of the sequence is hardwired into the connectivity, and the system is only learning the  
345 duration of the elements. As we demonstrated in Section 2.5, with the baseline parameters the network fails to  
346 learn if this restriction is relaxed and feedforward projections are indeed allowed between any columns.

347 A simple way to circumvent this problem is to ensure that neurons outside the populations coding for the  
348 current stimulus remain completely (or sufficiently) silent, so as to avoid the co-activation necessary for Hebbian  
349 synaptic potentiation (see Figure 6D). Although such an idealized behavior may be an appropriate solution from  
350 a modelling perspective, neurons in the cortex are rarely tuned exclusively to particular stimuli. Instead, most  
351 cells spike irregularly (typically at a low rate) even in the absence of input (ongoing activity, see e.g., Arieli  
352 et al., 1996), and many respond to multiple different inputs (Walker et al., 2011; Rigotti et al., 2013; de Vries  
353 et al., 2020).

354 A biologically more plausible alternative is to increase the Hebbian activation threshold  $r_{th}$ , such that noise-  
355 induced spontaneous activity does not lead to a modification of the synaptic strength. However, this introduces  
356 an additional, critical parameter in the model. Furthermore, such hard thresholds are coupled to the intensity of  
357 background activity and spontaneous spiking, with occasional higher rates possibly destabilizing the learning  
358 process.

### 359 3.3 Functional and neurophysiological considerations

360 From a functional perspective, a generic model of sequence processing should be able to perform various  
361 related tasks in addition to sequence replay, such as chunking, learning compositional sequences and handling  
362 non-adjacent dependencies in the input (Fitch and Martins, 2014; Wilson et al., 2018; Hupkes et al., 2019).  
363 Although Cone and Shouval (2021) discuss and provide an extension of the baseline network for higher-order  
364 Markovian sequences, the computational capacity of the model is fundamentally limited by the requirement of  
365 a unique stimulus-column (or stimulus-population) mapping. This characteristic means that for certain tasks,  
366 such as learning (hierarchical) compositional sequences (i.e., sequences of sequences), the model size would  
367 increase prohibitively with the number of sequences, as one would require a dedicated column associated with  
368 each possible sequence combination. In addition, it would be interesting to evaluate the model's ability to  
369 recognize and distinguish statistical regularities in the input in tasks such as chunking, which involve one or  
370 more sequences interleaved with random elements.

371 In their study, Cone and Shouval (2021) demonstrate that the extended, rate-based network can learn multiple,  
372 higher-order Markovian sequences when these are presented successively. For first-order Markovian sequences, this  
373 should also hold for the baseline spiking network model, contingent on preserving the unique stimulus-to-column  
374 mapping. However, it is also important to understand how the model behaves when two sequences are presented

375 *simultaneously*. This depends on the interpretation and expected behavior, and to the best of our knowledge  
376 there is little experimental and modeling work on this (but see, e.g., Murray and Escola, 2017). Nevertheless, if  
377 the two sequences are considered to be *independent*, we speculate that the networks will not be able to learn and  
378 treat them as such for multiple reasons. Assuming that projections between all columns are allowed (with the  
379 appropriate measures, see Section 2.5), in the spiking model the connections between the columns associated  
380 with the different sequences would also be strengthened upon temporal co-activation: for two simultaneously  
381 initiated sequences S1 and S2, the cross-columnar projections between a column  $C_i^{S1}$  associated with S1 and  
382 another column  $C_{i+1}^{S2}$  coding for an element at position  $i + 1$  in S2 would be (incorrectly) strengthened. In the  
383 case of the extended rate network, the context representations may mix and interfere in the external reservoir,  
384 and the issue of temporal co-activation discussed above is also likely to occur.

385 Moreover, convergence of learning in the cross-columnar synapses depends on the existence of two consecutive  
386 reward periods. As described in Section 2.2 and illustrated in Figure 2C, during the first reward (associated with  
387 the current sequence element) the weights are potentiated, even after the weights have reached a fixed point.  
388 However, a second reward, during which the weights are depressed, is necessary to achieve a net zero difference  
389 in the LTP and LTD traces at lower weight values. Although learning would converge even without a second  
390 reward, the fixed point will be different (higher), and thus convergence would occur for larger weights (possibly  
391 too large for stable firing rates). Given that the reward (novelty) signal is globally released both before and after  
392 each sequence element in the interpretation of Cone and Shouval (2021), the existence of a reward after the final  
393 element is guaranteed and therefore this is not an issue for the stimulation protocol used in the original and our  
394 study. If, on the other hand, we interpret the reward as a novelty signal indicating the next stimulus, we would  
395 not expect it to be present in this form after the last element of the sequence. In this case, the cross-columnar  
396 projections marking the transition from the penultimate to the ultimate element may not be learned accurately  
397 (weights would still converge, but likely to larger values than appropriate).

398 While a solution to the above issues is beyond the scope of this work, we speculate that a more granular  
399 architecture, in which multiple stimulus-specific sub-populations could form different cell assemblies within  
400 a single column, would be more in line with experimental evidence from the neocortex. Some functional  
401 specialization of single cortical columns has been hypothesized (Mountcastle, 1997; Harris and Shepherd, 2015),  
402 but such columns are typically composed of a number of cell groups responsive to a wider range of stimuli. We  
403 assume that mapping the model to such an extended columnar architecture would require a more complex,  
404 spatially-dependent connectivity to ensure similar WTA dynamics. The requirement of completely segregated  
405 populations tuned to unique stimuli, however, is more difficult to overcome and reconcile with experimental  
406 data. While the tuning curves of many cells (but by far not all, see de Vries et al., 2020) in the early sensory  
407 cortices are indeed strong and sharp (Hubel and Wiesel, 1959; Bitterman et al., 2008), these become weaker and  
408 broader in the following stages of the cortical hierarchy, where cells typically exhibit mixed selectivity (Rigotti  
409 et al., 2013; Fusi et al., 2016). Thus, more complex tasks requiring a mixture of representations can not be easily  
410 conceptualized in the context of the proposed network architecture.

411 As we demonstrated in Section 2.6, the model is relatively flexible with respect to the precise wiring patterns,  
412 as long as certain core, inhibition-related properties are preserved. Given that long-range projections in the  
413 neocortex are typically excitatory (Brown and Hestrin, 2009; Douglas and Martin, 2004), the original architecture  
414 (see Figure 1B) was implausible due to its reliance on cross-columnar inhibition. The relative ease in adapting the  
415 wiring to have only local inhibition is indicative of simple yet powerful and modular computational mechanisms,  
416 suggesting that these may be used as building blocks in more complex sequence learning architectures.

417 Despite these limitations and sensitivity to some parameters, the model presented by Cone and Shouval (2021) is  
418 an important step towards a better understanding of how cortical circuits process temporal information. While  
419 its modular structure enabling spatially segregated representations may be more characteristic for earlier sensory  
420 regions, the proposed local learning rule based on rewards, partially solving the credit assignment problem, is a  
421 more universal mechanism likely to occur across the cortex.

## 422 4 Materials and methods

423 The sequence learning model analyzed in this study is described in full detail in the original work of Cone  
424 and Shouval (2021). Nevertheless, given the numerous discrepancies between the model description and  
425 implementation (see Discussion), we present all the key properties and parameters that are necessary for  
426 a successful replication of the results, including the extended architectures investigated in Section 2.5 and  
427 Section 2.6.

## 4.1 Network architecture

The central characteristic of the network architecture is the modular columnar structure (see Figure 1A, B), where each of the  $N_C$  columns is associated with a unique sequence element (stimulus). Each column contains two excitatory (Timer and Messenger) and two associated inhibitory populations  $I_T$  and  $I_M$ , roughly corresponding to  $L_5$  and  $L_{2/3}$  in the cortex. In the following, we will refer to these cell populations as  $T^i$ ,  $M^i$ ,  $I_T^i$  and  $I_M^i$ , respectively, where the superscript  $i$  denotes the column  $C_i$ .

Each of the above populations is composed of  $N = 100$  leaky integrate-and-fire neurons, with the exception of the network simulated in Section 2.4, where  $N = 400$ . The wiring diagram of the baseline network used in Cone and Shouval (2021) is schematically illustrated in Figure 1B. Within a column  $C_i$ ,  $T^i$  cells connect to  $I_T^i$  and  $M^i$ , in addition to recurrent connections to other  $T^i$  cells.  $M^i$  neurons excite the local inhibitory population  $I_M^i$ , and are inhibited by  $I_T^i$ . Inhibition onto the excitatory cells also exists between the columns in a layer-specific manner, i.e.,  $I_T^i \rightarrow T^j$  and  $I_M^i \rightarrow M^j$ , with  $i \neq j$ . Lastly,  $M^i$  cells in  $C_i$  connect in a feedforward manner to  $T^{i+1}$  cells in the subsequent column  $C_{i+1}$ . All connections within the same and between different populations have a density of  $\varphi = 0.26$ . Note that only the feedforward projections  $M^i \rightarrow T^{i+1}$  and the recurrent  $T^i \rightarrow T^i$  connections are subject to plasticity (see below); all other connections are static. The plastic weights are initialized close to 0 and the static weights are normally distributed around their mean values with a standard deviation of 1.

The complete set of parameters for the architecture proposed in Cone and Shouval (2021) as well as the variants described below are specified in the Supplementary Materials.

### 4.1.1 Scaled model

For the scaled network model described in Section 2.4, the number of neurons in each populations was increased to  $N' = 400$  from  $N = 100$ . To keep the input variance constant, in the standard scaling scenario (Figure 5A) we followed the common approach for balanced random networks (van Vreeswijk and Sompolinsky, 1998; Litwin-Kumar and Doiron, 2012) and reduced all non-plastic synaptic weights by multiplying them with  $1/\sqrt{N'/N}$ . In addition, we halved the standard deviation  $\sigma_\xi$  of the background noise such that the firing rates were in the same range as for the baseline network. To restore the functional aspects of the network, additional tuning was required for most of the projections, see Supplementary Table S4.

### 4.1.2 All-to-all cross-columnar connectivity

In Section 2.5, the baseline network is modified by instantiating plastic excitatory connections between all columns  $M^i \rightarrow T^j$ , ( $i \neq j$ ) rather than solely between the columns representing consecutive elements of the stimuli (see Figure 6A). All other parameters are unchanged.

### 4.1.3 Alternative wiring with local inhibition

The functionally equivalent network analyzed in Section 2.6 required multiple wiring modifications (see Figure 7A). Inhibitory connections are local to the corresponding layer, with connections  $I_T^i \rightarrow T^i$  and  $I_M^i \rightarrow M^i$ . Timer cells  $T^i$  project to both  $M^i$  and  $I_M^i$ , as well as to  $I_T^j$  in other columns  $C_j$ . In layer  $L_{2/3}$ ,  $M^i$  cells project to  $T^{i+1}$  and  $I_M^j$ ,  $i \neq j$ .

## 4.2 Neuron model

The networks are composed of leaky integrate-and-fire (LIF) neurons, with fixed voltage threshold and conductance-based synapses. The dynamics of the membrane potential  $V_i$  for neuron  $i$  follows:

$$C_m \frac{dV_i}{dt} = g_L (V_{\text{rest}} - V_i(t)) + I_i^E(t) + I_i^I(t) + \xi(t) \quad (1)$$

where the leak-conductance is given by  $g_L$ ,  $I_i^E$  and  $I_i^I$  represent the total excitatory and inhibitory synaptic



467 input currents, and  $\xi$  is a noise term modelled as Gaussian white noise with standard deviation  $\sigma_\xi = 100$ , unless  
 468 otherwise stated. This noise term is sufficient to cause a low baseline activity of around 1 – 2 spks/sec. Upon  
 469 reaching a threshold  $V_{\text{th}} = -55$  mV ( $-50$  mV for inhibitory neurons), the voltage is reset to  $V_{\text{reset}}$  for a refractory  
 470 period of  $t_{\text{ref}} = 3$  ms. Note that the higher threshold for inhibitory neurons is critical for the faster decay of  
 471 their activity compared to Timer cells.

472 The dynamics of the synaptic conductances are modelled as exponential functions with an adaptation term, with  
 473 fixed and equal conduction delays for all synapse types. The equations of the model dynamics, along with the  
 474 numerical values for all parameters are summarized in Supplementary Tables S1-3.

475 In all figures depicting firing rates, these are estimated from the spike trains using an exponential filter with  
 476 time constant  $\tau_r = 40$  ms.

### 477 4.3 Eligibility-based learning rule

478 The main assumption of the learning rule is the availability of two synaptic eligibility traces at every synapse  
 479  $T_{ij}^p$  and  $T_{ij}^d$ , representing long-term potentiation (LTP) and depression (LTD), which can be simultaneously  
 480 activated through the Hebbian firing patterns.

481 For  $a \in \{p, d\}$ , the dynamics of the traces follows:

$$\tau^a \frac{dT_{ij}^a(t)}{dt} = -T_{ij}^a(t) + \eta^a H_{ij}(t) (T_{\text{max}}^a - T_{ij}^a(t)), \quad (2)$$

482 where  $\tau^a$  is the time constant,  $\eta^a$  is a scaling factor, and  $T_{\text{max}}^a$  is the saturation level of the trace.  $H_{ij}(t)$  is the  
 483 Hebbian term defined as the product of firing rates of the pre- and postsynaptic neurons:

$$H_{ij}(t) = \begin{cases} r_i(t)r_j(t) & \text{if } r_i(t)r_j(t) > r_{\text{th}} \\ 0 & \text{otherwise} \end{cases}, \quad (3)$$

484 with  $r_{\text{th}}$  ( $r_{\text{th}}^{\text{ff}}$ ) representing different threshold values for recurrent  $T$  to  $T$  (feedforward  $M$  to  $T$ ) connections.  
 485 Note that while this equation is used in both the original MATLAB implementation and in our re-implementation  
 486 in NEST, the Hebbian terms in the equations in Cone and Shouval (2021) are further normalized by  $T_{\text{max}}^a$ . For a  
 487 detailed analysis of the learning convergence, see the original study.

488 These activity-generated eligibility traces are silent and transient synaptic tags that can be converted into  
 489 long-term changes in synaptic strength by a third factor,  $R(t)$  which is modelled here as a global signal using  
 490 a delta function,  $R(t) = \delta(t - t_{\text{reward}} - d_{\text{reward}})$ , and is assumed to be released at each stimulus onset/offset.  
 491 Although typically signals of this sort are used to encode a *reward*, they can also, as is the case here, be framed  
 492 as a *novelty* signal indicating a new stimulus. Hence, the synaptic weights  $w_{ij}$  are updated through

$$\frac{dw_{ij}}{dt} = \eta R(t) (T_{ij}^p - T_{ij}^d) \quad (4)$$

493 where  $\eta$  ( $\eta_{\text{ff}}$  for feedforward) is the learning rate. Following the reward signal, which has a duration of 25 ms,  
 494 the eligibility traces are “consumed” and reset to zero, and their activation is set into a short refractory period of  
 495 25 ms. In practice, although the weight updates are tracked and evolve during each reward period according  
 496 to Equation 4, they are only updated at the end of the trial. However, this does not affect the results in any  
 497 significant manner (data not shown).

### 498 4.4 Stimulation protocol

499 Stimulus input is modelled as a 50 ms step signal, encoded as Poisson spike trains with a rate  $\nu_{\text{in}} = 30$  spks/sec.  
 500 In the baseline and the extended network discussed in Section 2.5, this input is injected into both  $T^i$  and  $T^j$   
 501 cells, with synaptic weights  $w_{\text{in}}$ . In the network discussed in Section 2.6, the input is restricted to  $T^i$ .

502 The training process of a network instance consists of 100 trials (unless otherwise stated), and in each trial the  
503 corresponding columns are stimulated at certain time points according to the input sequence, with the interval  
504 between elements representing the duration of the stimulus. At the beginning of each trial, the state of the  
505 neurons (membrane potential) and the eligibility traces are reset to their initial values. The test phase consists  
506 of multiple trials (usually 50), where the sequence is replayed upon a cued stimulation of the first column.

## 507 **4.5 Numerical simulations and analysis**

508 All numerical simulations were conducted using the Functional Neural Architectures (FNA) toolkit v0.2.1 (Duarte  
509 et al., 2021), a high-level Python framework for creating, simulating and evaluating complex, spiking neural  
510 microcircuits in a modular fashion. It builds on the PyNEST interface for NEST (Gewaltig and Diesmann, 2007),  
511 which provides the core simulation engine. To ensure the reproduction of all the numerical experiments and  
512 figures presented in this study, and abide by the recommendations proposed in (Pauli et al., 2018), we provide a  
513 complete code package that implements project-specific functionality within FNA (see Supplementary Materials)  
514 using NEST 2.20.0 (Fardet et al., 2020). For consistency checks with the reference implementation, we used  
515 *MATLAB* version R2020b.

## 516 **Conflict of Interest Statement**

517 The authors declare that the research was conducted in the absence of any commercial or financial relationships  
518 that could be construed as a potential conflict of interest.

## 519 **Author Contributions**

520 BZ, RD, and AM designed the study. BZ re-implemented the model and performed all simulations and analyses.  
521 BZ, RD, and AM contributed to writing of manuscript.

## 522 **Funding**

523 This work has received partial support from the the Initiative and Networking Fund of the Helmholtz Association,  
524 the Helmholtz Portfolio theme Supercomputing and Modeling for the Human Brain, and the Excellence Initiative  
525 of the German federal and state governments (G:(DE-82)EXS-SF-neuroIC002). Open access publication funded  
526 by the Deutsche Forschungsgemeinschaft (DFG, German Research Foundation) - 491111487.

## 527 **Acknowledgments**

528 The authors gratefully acknowledge the computing time granted by the JARA-HPC Vergabegremium on the  
529 supercomputer JURECA (Jülich Supercomputing Centre, 2021) at Forschungszentrum Jülich. In addition,  
530 we would like to thank Charl Linssen of the Simulation and Data Laboratory Neuroscience for his support  
531 concerning the neuron and synapse model implementations.

## 532 **Supplemental Data**

533 See enclosed Supplementary Material.

## 534 Data Availability Statement

535 All the relevant data and code is available in a public GitHub repository at  
536 [https://github.com/zbarni/re\\_modular\\_seqlearn](https://github.com/zbarni/re_modular_seqlearn). (see also Supplementary Materials). The MATLAB code used  
537 in Cone and Shouval (2021) and the revised version can be found in a ModelDB repository at <http://modeldb.yale.edu/266774>.

## 538 References

- 539 Arieli, A., Sterkin, A., Grinvald, A., and Aertsen, A. (1996). Dynamics of ongoing activity: explanation of the  
540 large variability in evoked cortical responses. *Science* 273, 1868–1871
- 541 August, D. and Levy, W. (1999). *Journal of Computational Neuroscience* 6, 71–90. doi:10.1023/a:1008861001091
- 542 Benureau, F. C. Y. and Rougier, N. P. (2018). Re-run, repeat, reproduce, reuse, replicate: Transforming code  
543 into scientific contributions. *Frontiers in Neuroinformatics* doi:10.3389/fninf.2017.00069
- 544 Bitterman, Y., Mukamel, R., Malach, R., Fried, I., and Nelken, I. (2008). Ultra-fine frequency tuning revealed in  
545 single neurons of human auditory cortex. *Nature* 451, 197–201. doi:10.1038/nature06476
- 546 Bouhadjar, Y., Wouters, D. J., Diesmann, M., and Tetzlaff, T. (2021). Sequence learning, prediction, and replay  
547 in networks of spiking neurons. *arXiv e-prints*, arXiv:2111.03456
- 548 Brown, S. P. and Hestrin, S. (2009). Intracortical circuits of pyramidal neurons reflect their long-range axonal  
549 targets. *Nature* 457, 1133–1136. doi:10.1038/nature07658
- 550 Cone, I. and Shouval, H. Z. (2021). Learning precise spatiotemporal sequences via biophysically realistic learning  
551 rules in a modular, spiking network. *eLife* 10. doi:10.7554/elife.63751
- 552 de Vries, S. E. J., Lecoq, J. A., Buice, M. A., Groblewski, P. A., Ocker, G. K., Oliver, M., et al. (2020). A  
553 large-scale standardized physiological survey reveals functional organization of the mouse visual cortex. *Nature*  
554 *Neuroscience* 23, 138–151. doi:10.1038/s41593-019-0550-9
- 555 Dehaene, S., Meyniel, F., Wacongne, C., Wang, L., and Pallier, C. (2015). The neural representation of  
556 sequences: From transition probabilities to algebraic patterns and linguistic trees. *Neuron* 88, 2–19. doi:  
557 10.1016/j.neuron.2015.09.019
- 558 Douglas, R. J. and Martin, K. (2004). Neuronal Circuits of the Neocortex. *Annual Review of Neuroscience* 27,  
559 419–451. doi:10.1146/annurev.neuro.27.070203.144152
- 560 Duarte, R., Uhlmann, M., van den Broeck, D., Fitz, H., Petersson, K. M., and Morrison, A. (2018). Encoding  
561 symbolic sequences with spiking neural reservoirs. In *Proceedings of the International Joint Conference on*  
562 *Neural Networks (IEEE)*, vol. 2018-July, 1–8. doi:10.1109/IJCNN.2018.8489114
- 563 Duarte, R., Zajzon, B., Schulte to Brinke, T., and Morrison, A. (2021). Functional neural architectures.  
564 doi:10.5281/ZENODO.5752597
- 565 Duarte, R. C. F. and Morrison, A. (2014). Dynamic stability of sequential stimulus representations in adapting  
566 neuronal networks. *Frontiers in Computational Neuroscience* 8, 124. doi:10.3389/fncom.2014.00124
- 567 Fardet, T., Vennemo, S. B., Mitchell, J., Mørk, H., Graber, S., Hahne, J., et al. (2020). NEST 2.20.0.  
568 doi:10.5281/ZENODO.3605514
- 569 Fiete, I. R., Senn, W., Wang, C. Z., and Hahnloser, R. H. (2010). Spike-time-dependent plasticity and  
570 heterosynaptic competition organize networks to produce long scale-free sequences of neural activity. *Neuron*  
571 65, 563–576. doi:10.1016/j.neuron.2010.02.003
- 572 Fino, E. and Yuste, R. (2011). Dense inhibitory connectivity in neocortex. *Neuron* 69, 1188–1203. doi:  
573 10.1016/j.neuron.2011.02.025
- 574 Fitch, W. T. and Martins, M. D. (2014). Hierarchical processing in music, language, and action: Lashley revisited.  
575 *Annals of the New York Academy of Sciences* 1316, 87–104. doi:10.1111/nyas.12406
- 576 Fitz, H., Uhlmann, M., Van Den Broek, D., Duarte, R., Hagoort, P., and Petersson, K. M. (2020). Neuronal  
577 spike-rate adaptation supports working memory in language processing. *Proceedings of the National Academy*  
578 *of Sciences of the United States of America* 117, 20881–20889. doi:10.1073/pnas.2000222117

- 579 Frémaux, N., Gerstner, W., and Fremaux, N. (2015). Neuromodulated spike-timing-dependent plasticity, and  
580 theory of three-factor learning rules. *Frontiers in Neural Circuits* 9. doi:10.3389/fncir.2015.00085
- 581 Fusi, S., Miller, E. K., and Rigotti, M. (2016). Why neurons mix: high dimensionality for higher cognition.  
582 *Current Opinion in Neurobiology* 37, 66–74. doi:10.1016/j.conb.2016.01.010
- 583 Gavornik, J. P. and Bear, M. F. (2014). Learned spatiotemporal sequence recognition and prediction in primary  
584 visual cortex. *Nature Neuroscience* 17, 732–737. doi:10.1038/nn.3683
- 585 Gerstner, W., Lehmann, M., Liakoni, V., Corneil, D., and Brea, J. (2018). Eligibility traces and plasticity on  
586 behavioral time scales: Experimental support of NeoHebbian three-factor learning rules. *Frontiers in Neural  
587 Circuits* 12. doi:10.3389/fncir.2018.00053
- 588 Gewaltig, M.-O. and Diesmann, M. (2007). NEST (neural simulation tool). *Scholarpedia* 2, 1430
- 589 Harris, K. D. and Shepherd, G. M. (2015). The neocortical circuit: Themes and variations. *Nature Neuroscience*  
590 18, 170–181. doi:10.1038/nn.3917
- 591 He, K., Huertas, M., Hong, S. Z., Tie, X., Hell, J. W., Shouval, H., et al. (2015). Distinct eligibility traces for  
592 LTP and LTD in cortical synapses. *Neuron* 88, 528–538. doi:10.1016/j.neuron.2015.09.037
- 593 Henin, S., Turk-Browne, N. B., Friedman, D., Liu, A., Dugan, P., Flinker, A., et al. (2021). Learning  
594 hierarchical sequence representations across human cortex and hippocampus. *Science Advances* 7. doi:  
595 10.1126/sciadv.abc4530
- 596 Hubel, D. H. and Wiesel, T. N. (1959). Receptive fields of single neurones in the cat's striate cortex. *The Journal  
597 of Physiology* 148, 574–591. doi:10.1113/jphysiol.1959.sp006308
- 598 Huertas, M. A., Schwettmann, S. E., and Shouval, H. Z. (2016). The role of multiple neuromodulators  
599 in reinforcement learning that is based on competition between eligibility traces. *Frontiers in Synaptic  
600 Neuroscience* 8. doi:10.3389/fnsyn.2016.00037
- 601 Huertas, M. A., Shuler, M. G. H., and Shouval, H. Z. (2015). A simple network architecture accounts for diverse  
602 reward time responses in primary visual cortex. *Journal of Neuroscience* 35, 12659–12672
- 603 Hupkes, D., Dankers, V., Mul, M., and Bruni, E. (2019). Compositionality decomposed: how do neural networks  
604 generalise? *arXiv e-prints*, arXiv:1908.08351
- 605 Iglewicz, B. and Hoaglin, D. C. (1993). *How to detect and handle outliers*, vol. 16 (Asq Press)
- 606 Jülich Supercomputing Centre (2021). JURECA: Data Centric and Booster Modules implementing the Modular  
607 Supercomputing Architecture at Jülich Supercomputing Centre. *Journal of large-scale research facilities* 7.  
608 doi:10.17815/jlsrf-7-182
- 609 Klampfl, S. and Maass, W. (2013). Emergence of dynamic memory traces in cortical microcircuit models through  
610 STDP. *Journal of Neuroscience* 33, 11515–11529. doi:10.1523/jneurosci.5044-12.2013
- 611 Klos, C., Miner, D., and Triesch, J. (2018). Bridging structure and function: A model of sequence learning and  
612 prediction in primary visual cortex. *PLOS Computational Biology* 14, e1006187. doi:10.1371/journal.pcbi.  
613 1006187
- 614 Litwin-Kumar, A. and Doiron, B. (2012). Slow dynamics and high variability in balanced cortical networks with  
615 clustered connections. *Nature neuroscience* 15, 1498–1505
- 616 Liu, C.-H., Coleman, J. E., Davoudi, H., Zhang, K., and Shuler, M. G. H. (2015). Selective activation of a  
617 putative reinforcement signal conditions cued interval timing in primary visual cortex. *Current Biology* 25,  
618 1551–1561. doi:10.1016/j.cub.2015.04.028
- 619 Maes, A., Barahona, M., and Clopath, C. (2021). Learning compositional sequences with multiple time  
620 scales through a hierarchical network of spiking neurons. *PLOS Computational Biology* 17, e1008866. doi:  
621 10.1371/journal.pcbi.1008866
- 622 Magee, J. C. and Grienberger, C. (2020). Synaptic Plasticity Forms and Functions. *Annual Review of Neuroscience*  
623 43, 95–117. doi:10.1146/annurev-neuro-090919-022842
- 624 Mongillo, G., Barak, O., and Tsodyks, M. (2008). Synaptic theory of working memory. *Science* 319, 1543–1546.  
625 doi:10.1126/science.1150769

- 626 Mountcastle, V. B. (1997). The columnar organization of the neocortex. *Brain* 120, 701–722. doi:10.1093/brain/  
627 120.4.701
- 628 Murray, J. M. and Escola, G. S. (2017). Learning multiple variable-speed sequences in striatum via cortical  
629 tutoring. *eLife* 6. doi:10.7554/elife.26084
- 630 Pauli, R., Weidel, P., Kunkel, S., and Morrison, A. (2018). Reproducing polychronization: A guide to  
631 maximizing the reproducibility of spiking network models. *Frontiers in Neuroinformatics* 12, 46. doi:  
632 10.3389/fninf.2018.00046
- 633 Plesser, H. E. (2018). Reproducibility vs. replicability: A brief history of a confused terminology. *Frontiers in*  
634 *Neuroinformatics* 11. doi:10.3389/fninf.2017.00076
- 635 Porr, B. and Wörgötter, F. (2007). Learning with “Relevance”: Using a Third Factor to Stabilize Hebbian  
636 Learning. *Neural Computation* 19, 2694–2719. doi:10.1162/neco.2007.19.10.2694
- 637 Rigotti, M., Barak, O., Warden, M. R., Wang, X.-J., Daw, N. D., Miller, E. K., et al. (2013). The importance of  
638 mixed selectivity in complex cognitive tasks. *Nature* 497, 585–590. doi:10.1038/nature12160
- 639 Tremblay, R., Lee, S., and Rudy, B. (2016). GABAergic Interneurons in the Neocortex: From Cellular Properties  
640 to Circuits. *Neuron* 91, 260–292. doi:10.1016/j.neuron.2016.06.033
- 641 Tripathy, S. J., Burton, S. D., Geramita, M., Gerkin, R. C., and Urban, N. N. (2015). Brain-wide analysis of  
642 electrophysiological diversity yields novel categorization of mammalian neuron types. *Journal of Neurophysiology*  
643 113, 3474–3489. doi:10.1152/jn.00237.2015
- 644 van Albada, S. J., Helias, M., and Diesmann, M. (2015). Scalability of asynchronous networks is limited  
645 by one-to-one mapping between effective connectivity and correlations. *PLOS Computational Biology* 11,  
646 e1004490. doi:10.1371/journal.pcbi.1004490
- 647 van Vreeswijk, C. and Sompolinsky, H. (1998). Chaotic balanced state in a model of cortical circuits. *Neural*  
648 *computation* 10, 1321–1371
- 649 Walker, K. M. M., Bizley, J. K., King, A. J., and Schnupp, J. W. H. (2011). Multiplexed and robust representations  
650 of sound features in auditory cortex. *Journal of Neuroscience* 31, 14565–14576. doi:10.1523/jneurosci.2074-11.  
651 2011
- 652 Wilson, B., Spierings, M., Ravignani, A., Mueller, J. L., Mintz, T. H., Wijnen, F., et al. (2018). Non-  
653 adjacent dependency learning in humans and other animals. *Topics in Cognitive Science* 12, 843–858.  
654 doi:10.1111/tops.12381
- 655 Xu, S., Jiang, W., ming Poo, M., and Dan, Y. (2012). Activity recall in a visual cortical ensemble. *Nature*  
656 *Neuroscience* 15, 449–455. doi:10.1038/nn.3036
- 657 Zajzon, B., Duarte, R., Mahmoudian, S., Morrison, A., and Duarte, R. (2019). Passing the Message: Rep-  
658 resentation Transfer in Modular Balanced Networks. *Frontiers in Computational Neuroscience* 13, 79.  
659 doi:10.3389/fncom.2019.00079
